# Supplementary material
Source: Springer Nature journal article supplement (https://www.springermedizin.de/resource/supplementary/13075_2010_3079_MOESM1_ESM.pdf/9693690)

sMer (ng/ml)

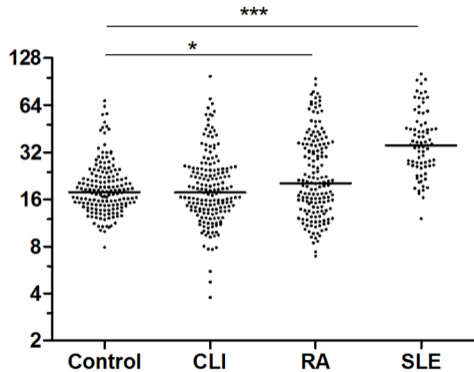

sTyro3 (ng/ml)

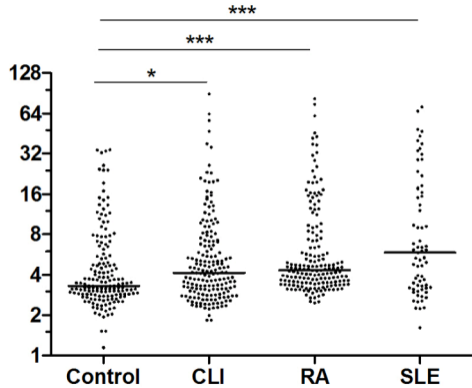

Supplement: MOESM1 [file 9693690]
